# Supplementary material
Source: PubMed Central journal article supplement (PMC3811210)
Supplement: AEM.01556-13_zam999104772so1.pdf [file AEM.01556-13_zam999104772so1.pdf]

1 **Supplemental Material (SM)**

2 **Mercury methylation by the methanogen *Methanospirillum hungatei***

3  
4  
5 Ri-Qing Yu,<sup>a</sup> John R. Reinfelder,<sup>b</sup> Mark E. Hines,<sup>c</sup> Tamar Barkay<sup>a</sup>

6  
7 <sup>a</sup>Department of Biochemistry and Microbiology, Rutgers University, New Brunswick, NJ 08901,  
8 USA.

9 <sup>b</sup>Department of Environmental Sciences, Rutgers University, New Brunswick, NJ 08901, USA.

10 <sup>c</sup>Department of Biological Sciences, University of Massachusetts Lowell, Lowell, MA 01854,  
11 USA.

12  
13  
14 Address correspondence to Riqing Yu, [riqing@gmail.com](mailto:riqing@gmail.com); and Tamar Barkay,  
15 [barkay@AESOP.Rutgers.edu](mailto:barkay@AESOP.Rutgers.edu).

16  
17  
18  
19  
20  
21  
22 **This supplemental material includes:**

- 23 1) Materials and Methods  
24 2) References  
25 3) Supplementary Figures S1 to S5  
26  
27  
28  
29  
30

## 31 **Materials and Methods**

32 **Mercury Methylation Experiments.** Individual cultures for methylation experiments were pre-  
33 grown for 4-5 days until they reached exponential phase. Before tests, pre-grown cells of all  
34 strains were washed twice with fresh sulfide-free media under strictly anaerobic conditions using  
35 tightly sealed 50 ml centrifuge tubes (centrifuged for 20 min. at 3,000 rpm). Washed cells were  
36 then resuspended in a sulfide-free medium for each strain and used as inocula. A similar dilution  
37 of inoculum of each individual strain (roughly 10%) was used in Hg methylation experiments,  
38 e.g., roughly 7 ml of pre-grown culture which was subject to washing was added to 63 ml of  
39 fresh medium in a 130 ml serum bottle. Initial inoculation of each strain was adjusted to a similar  
40 cell density in different experiments by adjusting to final OD<sub>660</sub> of 0.010-0.011 (about  $2.8 \times 10^4$   
41 cells ml<sup>-1</sup>) for *M. hungatei* and to 0.020-0.022 (about  $4.6 \times 10^5$  cells ml<sup>-1</sup>) for *D. africanus* and  
42 others. Experiments were performed in triplicate. Heat killed abiotic controls, prepared by  
43 treating cultures at 80 °C for 1 h (1), and sterilized media blanks were included in all methylation  
44 experiments.

45 Potential Hg methylation rates were measured by spiking <sup>203</sup>HgCl<sub>2</sub> (in 0.1 N HCl) kindly  
46 provided by Christy C. Bridges (Mercer University School of Medicine, Macon, GA). The  
47 radioisotope (specific activity, 2.504 μCi μg<sup>-1</sup>) was injected into each serum bottle at  
48 180.6~191.9 kBq L<sup>-1</sup> (corresponding to 9.7~10.3 nM or 1.9~2.1 μg Hg L<sup>-1</sup>). The final  
49 concentration of Hg in these incubation was similar to or lower than concentrations in previous  
50 methylation studies (2-5). A volume of 0.1 N NaOH similar to that of the injected <sup>203</sup>Hg substrate  
51 was immediately injected into the serum bottles to neutralize the added acid, and the cultures  
52 were thoroughly mixed by vortexing. Cultures were then statically incubated at either 32 or 37  
53 °C in the dark. Ten ml aliquots were withdrawn with a syringe in daily intervals for MeHg

54 extraction and a similar volume of O<sub>2</sub>-free 100% N<sub>2</sub> was added to the bottles to maintain  
55 constant pressure for five days.

56 Newly synthesized CH<sub>3</sub><sup>203</sup>Hg in cultures was separated from unreacted <sup>203</sup>HgCl<sub>2</sub> by a  
57 toluene extraction method that was modified from previous studies (6-8). Samples were  
58 extracted on the day of sampling to minimize the effect of <sup>203</sup>Hg decay. Recoveries of MeHg  
59 ranged from 90 to 98% as determined by using cell cultures to which 2 ml of 3N HCl were added  
60 to terminate microbial activities followed by the addition of ~0.1 μCi <sup>14</sup>C-CH<sub>3</sub>HgCl (specific  
61 activity, 60 mCi/mmol; radiochemical purity, 95.2%; Amersham Corp., Buckinghamshire,  
62 England), and employing the same extraction protocol. The radiotracer approach allows quick  
63 analysis of potential methylation rates at an ambient total Hg concentration and/or at trace levels  
64 (6, 9). Since previous tests showed the potential formation of unknown organic forms of <sup>203</sup>Hg  
65 (Mark Marvin DiPasquale, USGS, personal communication) and low levels of Hg(II) carryover  
66 into toluene are known (10), the formation of MeHg in *M. hungatei* cultures was confirmed by  
67 the detection of MeHg by EPA method 1630 (11).

68 Potential initial Hg methylation rates (fmol MeHg per μg protein day<sup>-1</sup>) were calculated  
69 from the linear range of lines describing MeHg concentrations vs. time, either normalized by  
70 initial protein (for Fig. 1a) or by protein levels at each time point for Fig. 2. The initial  
71 concentration of cell proteins at inoculation was used in the calculations for Fig. 1a to allow a  
72 protein-normalized comparison among different treatments and with results obtained by others  
73 (5). The Hg methylation rates (Fig. 2) were calculated based on the initially linear range of  
74 methylation in 32 h for all strains and treatments except for *G. sulfurreducens* incubated at 32 °C  
75 and *M. hungatei* at 37 °C where 12 hrs measurements were used to calculate initial rates.

76

77 **REFERENCES**

- 78
- 79 1. **Wiatrowski HA, Ward PM, Barkay T.** 2006. Novel reduction of mercury(II) by mercury-  
80 sensitive dissimilatory metal reducing bacteria. *Environ. Sci. Technol.* **40**:6690-6696.
- 81 2. **Schaefer JK, Morel FMM.** 2009. High methylation rates of mercury bound to cysteine by  
82 *Geobacter sulfurreducens*. *Nature Geosci.* **2**:123-126.
- 83 3. **Kerin EJ, Gilmour CC, Roden E, Suzuki MT, Coates JD, Mason RP.** 2006. Mercury  
84 methylation by dissimilatory iron-reducing bacteria. *Appl. Environ. Microbiol.* **72**:7919-  
85 7921.
- 86 4. **Benoit JM, Gilmour CC, Mason RP.** 2001. Aspects of bioavailability of mercury for  
87 methylation in pure cultures of *Desulfobulbus propionicus* (1pr3). *Appl. Environ. Microbiol.*  
88 **67**:51-58.
- 89 5. **Pak K, Bartha R.** 1998. Mercury methylation by interspecies hydrogen and acetate transfer  
90 between sulfidogens and methanogens. *Appl. Environ. Microbiol.* **64**:1987-1990.
- 91 6. **Yu RQ, Flanders JR, Mack EE, Turner R, Mirza MB, Barkay T.** 2012. Contribution of  
92 coexisting sulfate and iron reducing bacteria to methylmercury production in freshwater river  
93 sediments. *Environ. Sci. Technol.* **46**:2684-2691.
- 94 7. **Marvin-DiPasquale MC, Agee JL, Bouse RM, Jaffe BE.** 2003. Microbial cycling of  
95 mercury in contaminated pelagic and wetland sediments of San Pablo Bay, California.  
96 *Environ. Geol.* **43**:260-267.
- 97 8. **Hines ME, Faganeli J, Adatto I, Horvat M.** 2006. Microbial mercury transformations in  
98 marine, estuarine and freshwater sediment downstream of the Idrija Mercury Mine, Slovenia.  
99 *Appl. Geochem.* **21**:1924-1939.
- 100 9. **Gilmour CC, Riedel GS.** 1995. Measurement of Hg methylation in sediments using high  
101 specific-activity Hg-203 and ambient incubation. *Water Air and Soil Pollution* **80**:747-756.
- 102 10. **Han SH, Gill GA.** 2005. Determination of mercury complexation in coastal and estuarine  
103 waters using competitive ligand exchange method. *Environ. Sci. Technol.* **39**:6607-6615.
- 104 11. **EPA.** 2001. Method 1630: Methyl Mercury in Water by Distillation, Aqueous Ethylation,  
105 Purge and Trap, and CVAFS (EPA-821-R-01-020, January 2001). Office of Water, Office of  
106 Science and Technology, Engineering and Analysis Division 4303. US Environmental  
107 Protection Agency, Washington, D. C.
- 108
- 109
- 110
- 111
- 112
- 113
- 114
- 115
- 116
- 117
- 118
- 119
- 120
- 121

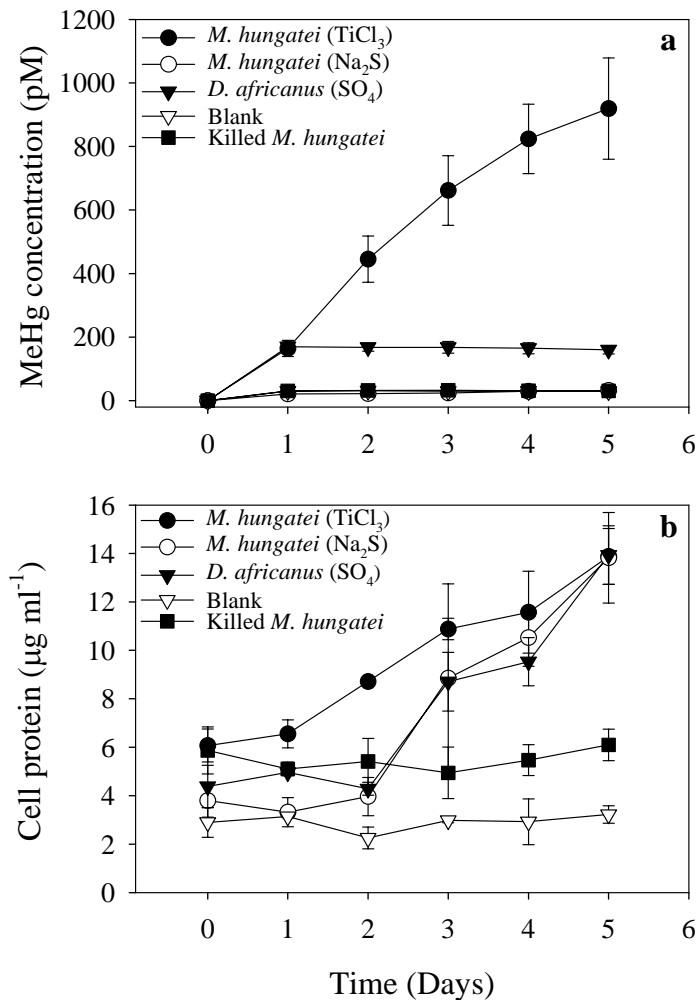

122  
123  
124  
125  
126  
127 **FIG. S1** Hg methylation by *M. hungatei* JF-1 and *D. africanus* DSM 2603. Synthesis of MeHg  
128 (pM) (a) and cell growth (protein concentrations, b) of *M. hungatei* in media with TiCl<sub>3</sub> or Na<sub>2</sub>S  
129 as a reductant, and *D. africanus* in medium containing Na<sub>2</sub>SO<sub>4</sub> as a terminal electron acceptor.  
130  
131  
132  
133  
134  
135

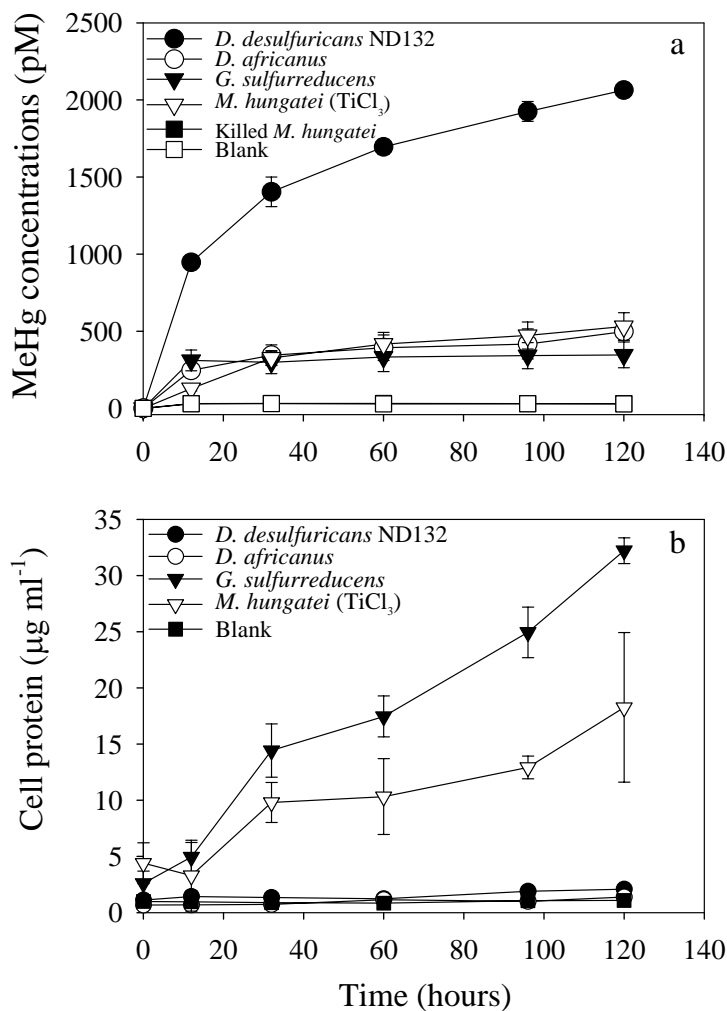

136  
 137  
 138  
 139  
 140  
 141  
 142  
 143  
 144  
 145  
 146  
 147

**FIG. S2** Comparison of Hg methylation by *M. hungatei* JF-1 with activities of known methylating bacteria. MeHg concentrations (a) and cell growth (b) during incubation of *D. desulfuricans* ND132 (pyruvate as an electron donor and fumarate as an acceptor), *D. africanus* DSM 2603 (pyruvate and fumarate), *G. sulfurreducens* PCA (sodium acetate and ferric acetate) at 32 °C, and *M. hungatei* JF-1 at 37 °C. TiCl<sub>3</sub> was served as a reductant in all incubations.

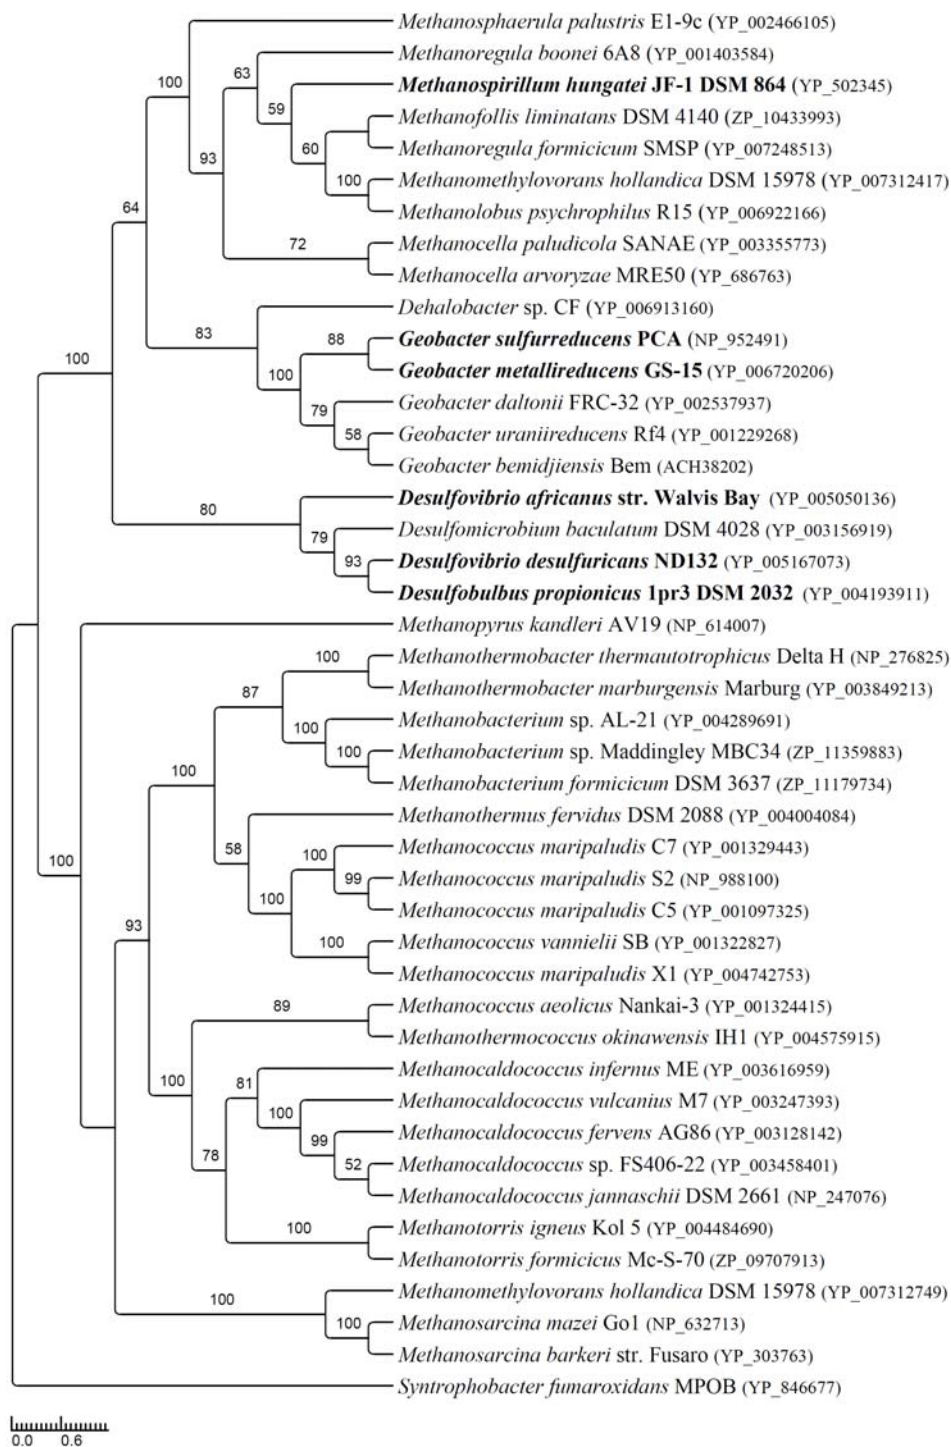

148  
 149 **FIG S3** Maximum likelihood phylogeny of HgcA orthologs (or paralogs) from methanogens,  
 150 and sulfate and iron reducing bacteria. Confirmed Hg methylators are highlighted in bold.  
 151 Accession numbers are listed in parentheses. Numbers at branching points denote boot support as  
 152 a percentage of 100 successful resampling.

153  
154  
155  
156  
157  
158  
159

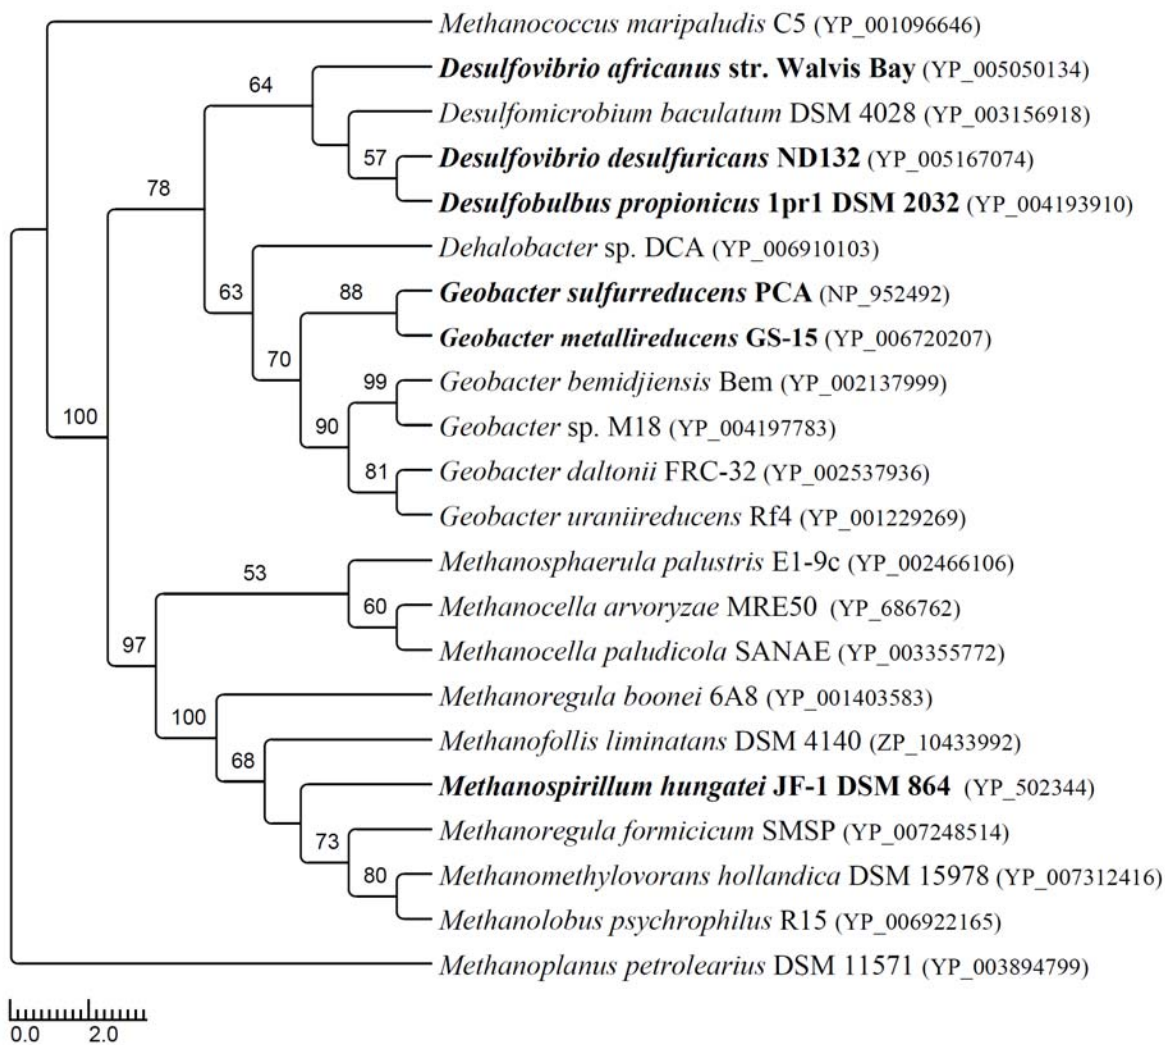

160  
161  
162  
163  
164  
165  
166  
167  
168  
169  
170  
171  
172  
173  
174

**FIG S4** Maximum likelihood phylogeny of HgcB orthologs (or paralogs) from methanogens, and sulfate and iron reducing bacteria. Confirmed Hg methylators are highlighted in bold. Accession numbers are listed in parentheses.



175  
176  
177

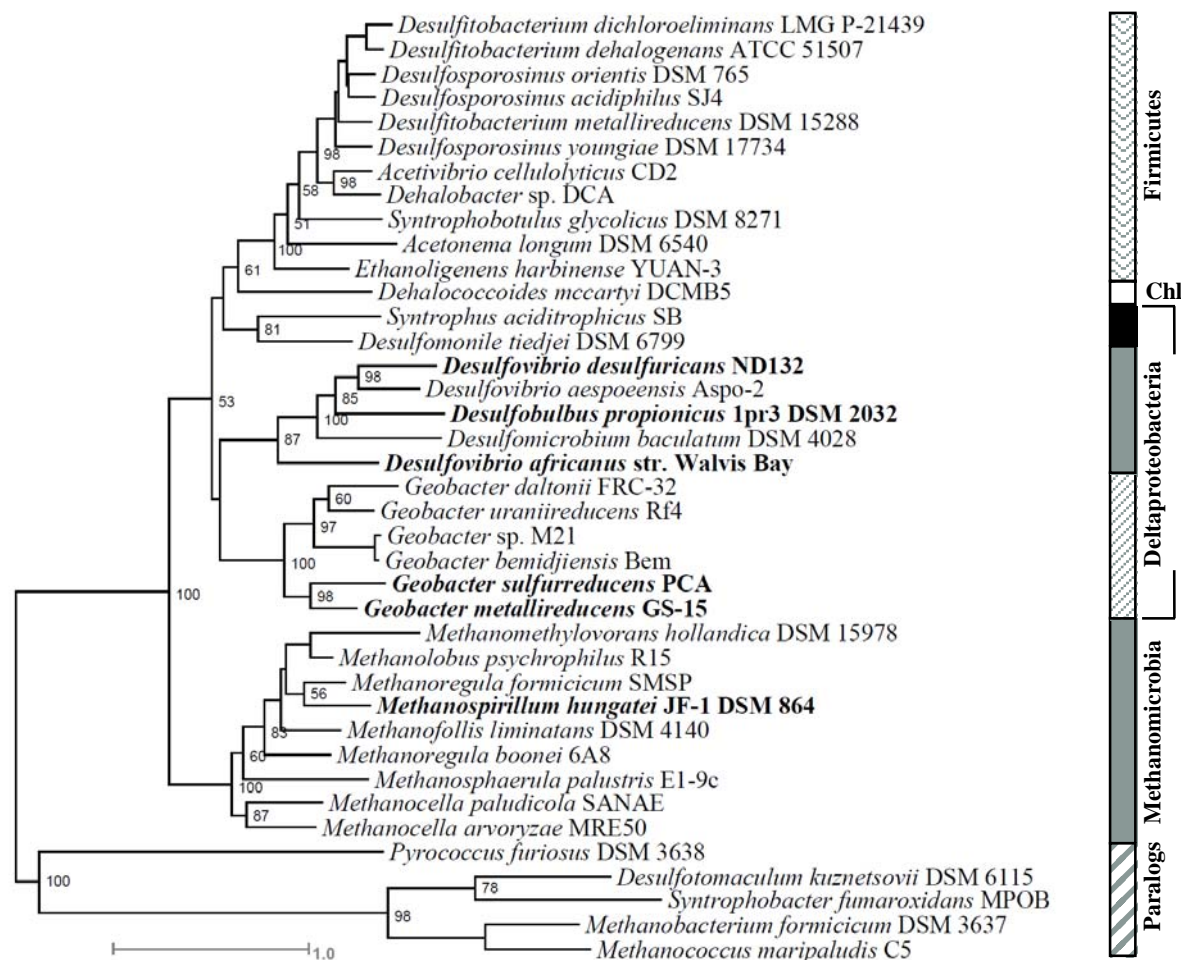

178  
179  
180  
181  
182  
183  
184  
185  
186  
187  
188  
189  
190

**FIG S5** Maximum likelihood phylogeny of concatenated HgcA and HgcB from known Hg methylating species (shown in bold) and orthologs identified by homology to the proteins of *M. hungatei* JF-1. The bar on the right identifies taxa at the phylum/class level; Chl stands for Chloroflexi and the Deltaproteobacteria bracket distinguishes iron reducers, sulfate reducers, and syntrophs. The tree is out-grouped by paralogs of Hgc proteins belonging to the CdhD family. The bar at the bottom indicates branch length corresponding to 1 substitution per 100 amino acids.
